# Supplementary material for: Effects of Fatty Acid Therapy in Addition to Strong Statin on Coronary Plaques in Acute Coronary Syndrome: An Optical Coherence Tomography Study
Source: PubMed Central journal article supplement — J Am Heart Assoc. 2020 Aug 1;9(16):e015593. doi: 10.1161/JAHA.119.015593 (PMC7660823; doi:10.1161/jaha.119.015593), 2020-08-01
Supplement: JAH3-9-e015593-s001.pdf [file JAH3-9-e015593-s001.pdf]

# **SUPPLEMENTAL MATERIAL**

**Table S1. Comparison of OCT findings at baseline between culprit vessel and non-culprit vessel.**

|                               | Control group (n=31)  |                           |                | EPA group (n=31)      |                           |                | EPA+DHA group (n=35) |                           |                |
|-------------------------------|-----------------------|---------------------------|----------------|-----------------------|---------------------------|----------------|----------------------|---------------------------|----------------|
|                               | Culprit vessel (n=10) | Non-culprit vessel (n=21) | <i>P</i> value | Culprit vessel (n=14) | Non-culprit vessel (n=17) | <i>P</i> value | Culprit vessel (n=9) | Non-culprit vessel (n=26) | <i>P</i> value |
| Minimal FCT, $\mu\text{m}$    | 140 (60-180)          | 120 (80-195)              | 0.8490         | 150 (105-170)         | 90 (65-145)               | 0.1201         | 120 (60-220)         | 91 (68-150)               | 0.7330         |
| Maximal lipid arc, $^{\circ}$ | 196.4 (148.4-253.2)   | 202.5 (163.0-227.3)       | 0.9326         | 164.3 (134.1-227.9)   | 189.2 (151.5-250.2)       | 0.2039         | 175.2 (160.7-208.7)  | 177.6 (128.9-230.9)       | 0.9398         |
| Average lipid arc, $^{\circ}$ | 154.2 (127.2-209.3)   | 147.3 (124.9-163.4)       | 0.7836         | 131.9 (118.2-170.8)   | 152.7 (134.5-190.1)       | 0.1169         | 148.2 (127.7-191.3)  | 142.5(116.2-204.4)        | 0.9849         |
| Lipid length, mm              | 5.1 (3.2-8.3)         | 4.6 (2.6-6.9)             | 0.5539         | 4.3 (2.3-6.2)         | 4.2 (3.5-5.5)             | 0.6473         | 4.4 (2.6-7.6)        | 3.3 (2.0-5.5)             | 0.2571         |
| Lipid volume index            | 845.7 (432.6-1165.6)  | 669.6 (386.2-1131.7)      | 0.5684         | 530.8 (265.7-948.0)   | 730.6 (506.6-1034.0)      | 0.5869         | 624.3 (446.7-1019.9) | 432.4 (339.6-857.1)       | 0.2655         |
| Macrophage infiltration       | 8 (80)                | 20 (95)                   | 0.1798         | 10 (71)               | 17 (100)                  | 0.0182         | 9 (100)              | 24 (92)                   | 0.3915         |
| Cholesterol crystal           | 3 (30)                | 5 (24)                    | 0.7121         | 1 (7)                 | 2 (12)                    | 0.6649         | 3 (33)               | 3 (12)                    | 0.1348         |
| Microchannel                  | 2 (20)                | 4 (19)                    | 0.9500         | 1 (7)                 | 4 (24)                    | 0.2170         | 2 (22)               | 4 (15)                    | 0.6390         |

|                |        |        |        |       |       |        |       |       |       |
|----------------|--------|--------|--------|-------|-------|--------|-------|-------|-------|
| Plaque rupture | 1 (10) | 2 (10) | 0.9666 | 0 (0) | 1 (6) | 0.3563 | 0 (0) | 0 (0) | 1.000 |
|----------------|--------|--------|--------|-------|-------|--------|-------|-------|-------|

---

Values are presented as medians ((interquartile interval). DHA, docosahexaenoic acid; EPA, eicosapentaenoic acid; FCT, fibrous cap thickness.

**Table S2. Clinical outcomes.**

|                                    | Control group | EPA group | EPA+DHA group | <i>P</i> value |
|------------------------------------|---------------|-----------|---------------|----------------|
|                                    | (n=38)        | (n=38)    | (n=38)        |                |
| Major adverse cardiovascular event | 9 (24)        | 4(11)     | 9 (24)        | 0.274          |
| All-cause death                    | 0             | 0         | 0             |                |
| Cardiac death                      | 0             | 0         | 0             |                |
| Non-fatal myocardial infarction    | 1 (2)         | 1 (3)     | 0             | 0.562          |
| Stroke                             | 0             | 0         | 0             |                |
| Coronary revascularization         | 9 (24)        | 4 (11)    | 9 (24)        | 0.274          |
| Target lesion revascularization    | 2 (5)         | 2 (5)     | 2 (4)         | 1.000          |

Values are presented as n (%). DHA, docosahexaenoic acid; EPA, eicosapentaenoic acid.

**Table S3. Absolute change and percent change for OCT measurements between diabetes mellitus and non-diabetes mellitus.**

|                          | Diabetes mellitus (n=25) | Non-diabetes mellitus (n=72) | <i>P</i> value |
|--------------------------|--------------------------|------------------------------|----------------|
| <b>Minimum FCT</b>       |                          |                              |                |
| Absolute change          | 30 (0-90)                | 35 (0-97.5)                  | 0.5996         |
| Percent change           | 20.0 (0.8-100.0)         | 36.1 (0-118.6)               | 0.7101         |
| <b>Maximal lipid arc</b> |                          |                              |                |
| Absolute change          | -16.6 (-33.7-0)          | -15.0 (-40.0--1.9)           | 0.8885         |
| Percent change           | -10.0 (-18.6-0)          | -8.1 (-19.7--1.2)            | 0.8950         |
| <b>Average lipid arc</b> |                          |                              |                |
| Absolute change          | -12.9 (-58.4-19.8)       | -1.9 (-14.8-12.7)            | 0.2892         |
| Percent change           | -8.1 (-29.8-14.8)        | -1.4 (-12.0-8.4)             | 0.2727         |

Lipid length

|                 |                 |                   |        |
|-----------------|-----------------|-------------------|--------|
| Absolute change | -0.4 (-1.6-0)   | -0.4 (-1.2-0.4)   | 0.2424 |
| Percent change  | -18.8 (-30.3-0) | -8.2 (-28.3-16.7) | 0.1559 |

Lipid volume index

|                 |                        |                     |        |
|-----------------|------------------------|---------------------|--------|
| Absolute change | -139.5 (-260.21--16.0) | -55.3 (-225.5-77.4) | 0.2382 |
| Percent change  | -16.4 (-42.8--4.0)     | -8.9 (-35.6-25.6)   | 0.1421 |

---

Values are presented as medians ((interquartile interval). FCT, fibrous cap thickness.
